# Supplementary material for: Adsorption dominant catalytic activity of a carbon dots stabilized gold nanoparticles system
Source: Royal Society of Chemistry journal article supplement (doi:10.1039/c4dt00630e), 2014-01-01
Supplement: c4dt00630e1.pdf [file c4dt00630e1.pdf]

## Electronic Supplementary Information

Adsorption dominant catalytic activity in carbon dots stabilized gold  
nanoparticles system

*Ruihua Liu, Juan Liu, Weiqian Kong, Hui Huang, Xiao Han, Xing Zhang, Yang Liu,\* Hui Huang,\*  
and Zhenhui Kang\**

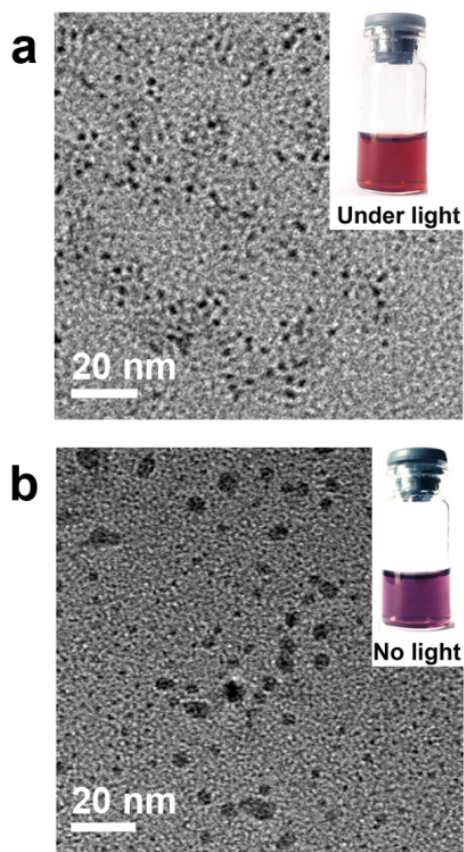

**Figure S1.** TEM image and digital camera images (inset) of AuNPs-CDs synthesized under (a) visible light and (b) no light.

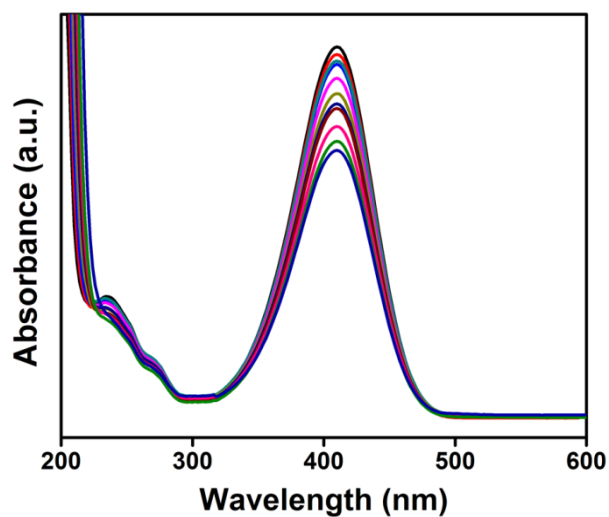

**Figure S2.** UV-vis absorption spectra for the catalytic reduction of 4-nitrophenol without AuNPs-CDs as catalyst.

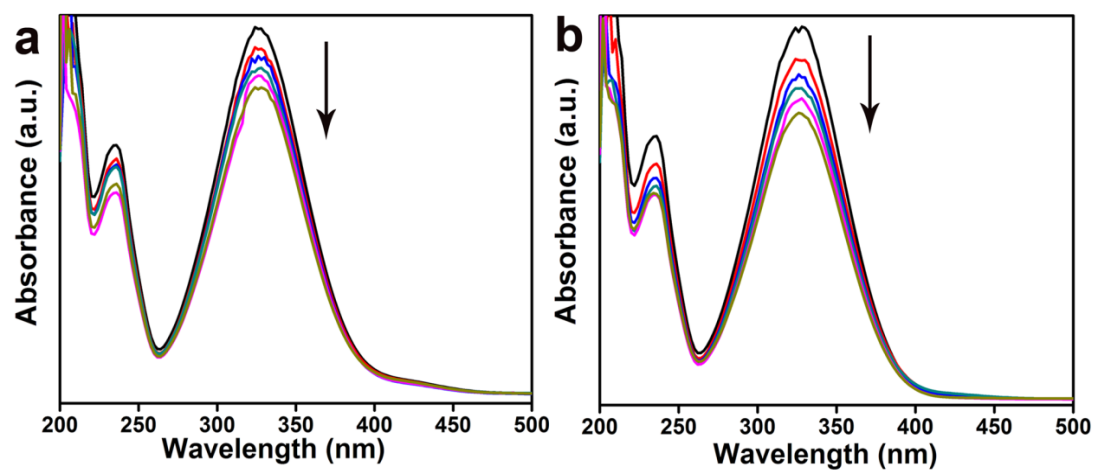

**Figure S3.** UV-vis absorption spectra for the adsorption of 4-nitrophenol with (a) CDs and (b) AuNPs-CDs.

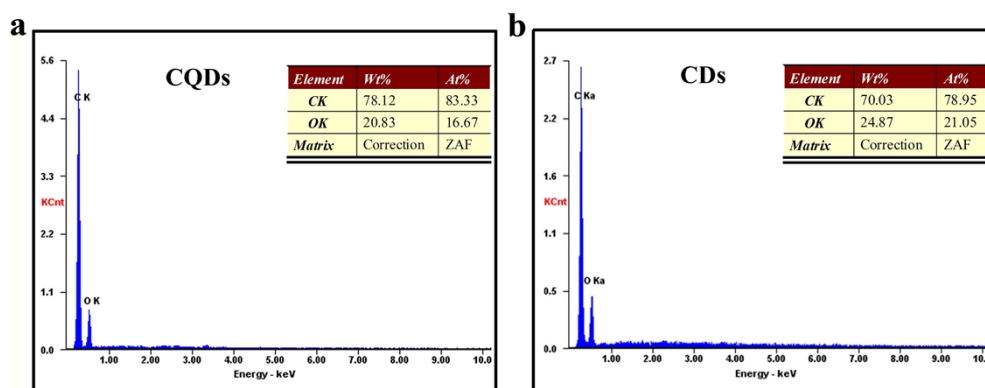

**Figure S4.** EDX spectra of CDs and CQDs.
